# Supplementary material
Source: PubMed Central journal article supplement (PMC2820653)
Supplement: mmc1.pdf [file mmc1.pdf]

Biophysical Journal, Volume 98

**Supporting Material**

**Mobility of cytoplasmic, membrane and DNA-binding proteins in Escherichia coli**

Mohit Kumar, Mario S. Mommer, and Victor Sourjik

**Table S1.** Expression constructs, strain background and induction levels.

| <b>Protein</b> | <b>Expression plasmid</b> | <b>Strain</b> | <b>Induction (<math>\mu</math>M IPTG)</b> |
|----------------|---------------------------|---------------|-------------------------------------------|
| eYFP           | pVS132                    | RP437         | 100                                       |
| PtsH-YFP       | pVS348                    | VS116         | 80, 120 & 150                             |
| Crr-YFP        | pVS345                    | VS116         | 30 & 50                                   |
| CFP-CheW-YFP   | pVS264                    | VS116         | 80 & 100                                  |
| YFP-YFP-YFP    | pVS685                    | VS116         | 80 & 100                                  |
| CFP-CheR-YFP   | pVS266                    | VS116         | 120 & 150                                 |
| DnaK-YFP       | pVS617                    | RP437         | 100                                       |
| HtpG-YFP       | pVS627                    | RP437         | 100                                       |
| CFP-CheA-YFP   | pVS267                    | VS116         | 30, 50, 80 & 100                          |
| Tar(1-397)-YFP | pVS419                    | VS116         | 10 & 20                                   |
| Tsr(1-218)-YFP | pVS686                    | VS116         | 10                                        |
| Tar-YFP        | pVS263                    | VS116         | 20, 40 & 50                               |
| MtlA-YFP       | pVS448                    | VS116         | 3                                         |
| NagE-YFP       | pVS576                    | VS116         | 5                                         |
| LacY-YFP       | pSN7                      | VS116         | 3                                         |
| Hns-YFP        | pVS483                    | MG1655        | 0                                         |
| TetR-YFP       | pSR5                      | SR1           | 50                                        |

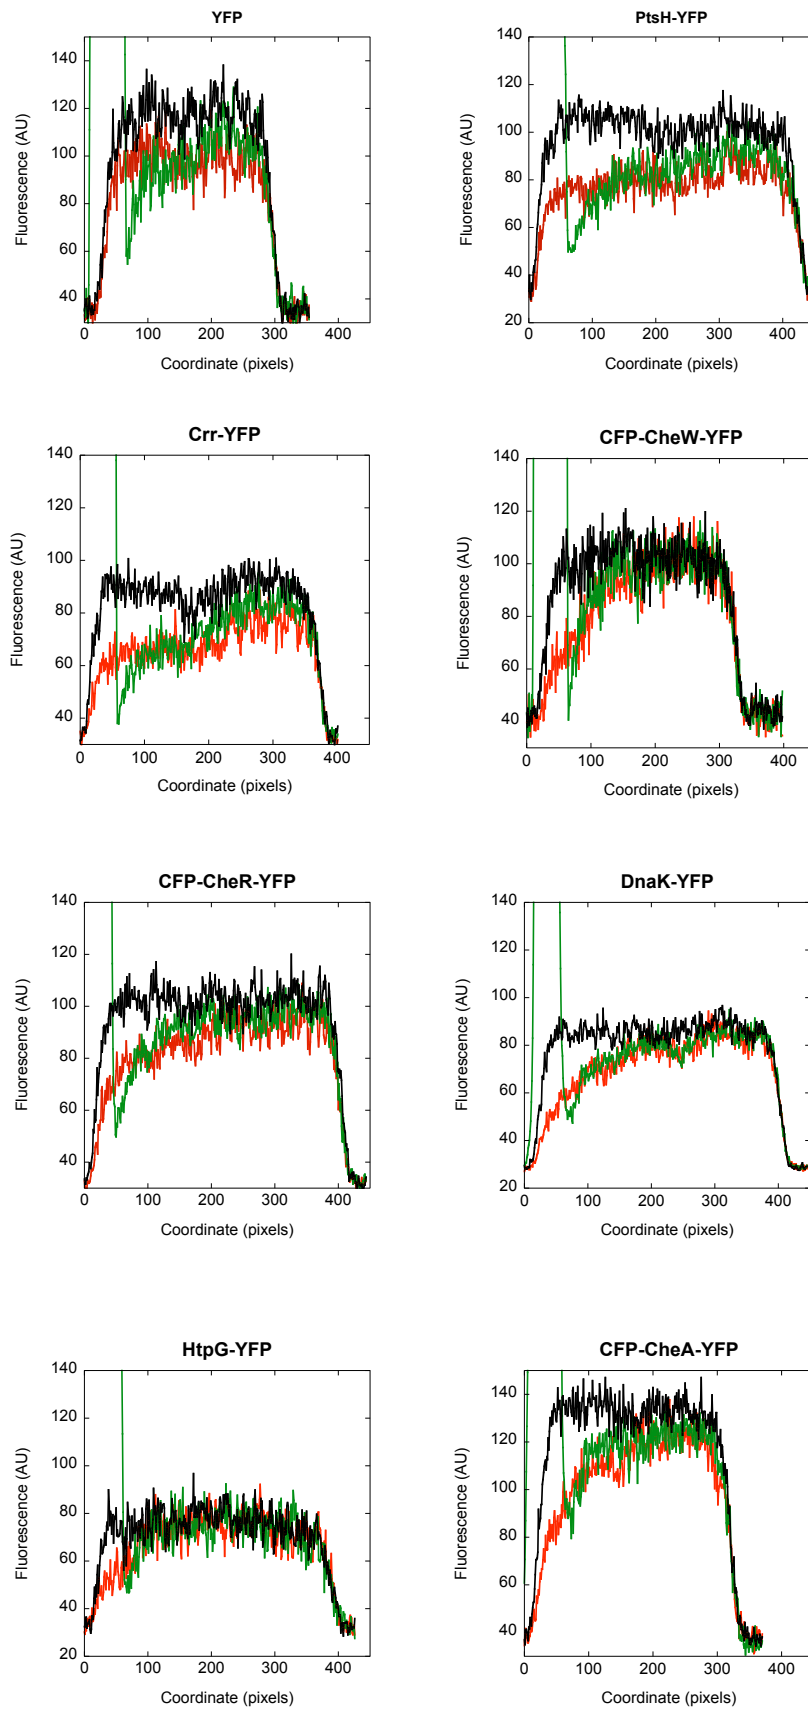

**Figure S1.** Fluorescence profiles of the pre-bleach (black), bleach (green) and the first post-bleach (red) images of representative cells expressing indicated fusions. Compare with Fig. 1B.
